# Supplementary material
Source: PubMed Central journal article supplement (PMC7318019)

**FIG S1**

Nucleic acid changes in HA and NA of the six selected variants, LAN (P5), LAN (P7), LAN (P10), LAN+IFN (P5), LAN+IFN (P10), and P10. Ratio is the percentage of the population with the specific nucleic acid change. *Italics* indicates the presence of a mixed population.

**FIG S2**

Nucleic acid changes in HA and NA at passages 2, 3, and 4 after treatment with laninamivir alone (LAN) or laninamivir plus IFN- $\lambda$ 1 (LAN+IFN). The ratios indicate the percentage of each virus population with the specific nucleic acid change. *Italics* indicate the presence of a mixed population.

**FIG S3**

(A) HA and (B) NA mutation frequency in A(H1N1)pdm09 influenza A viruses seen by year.

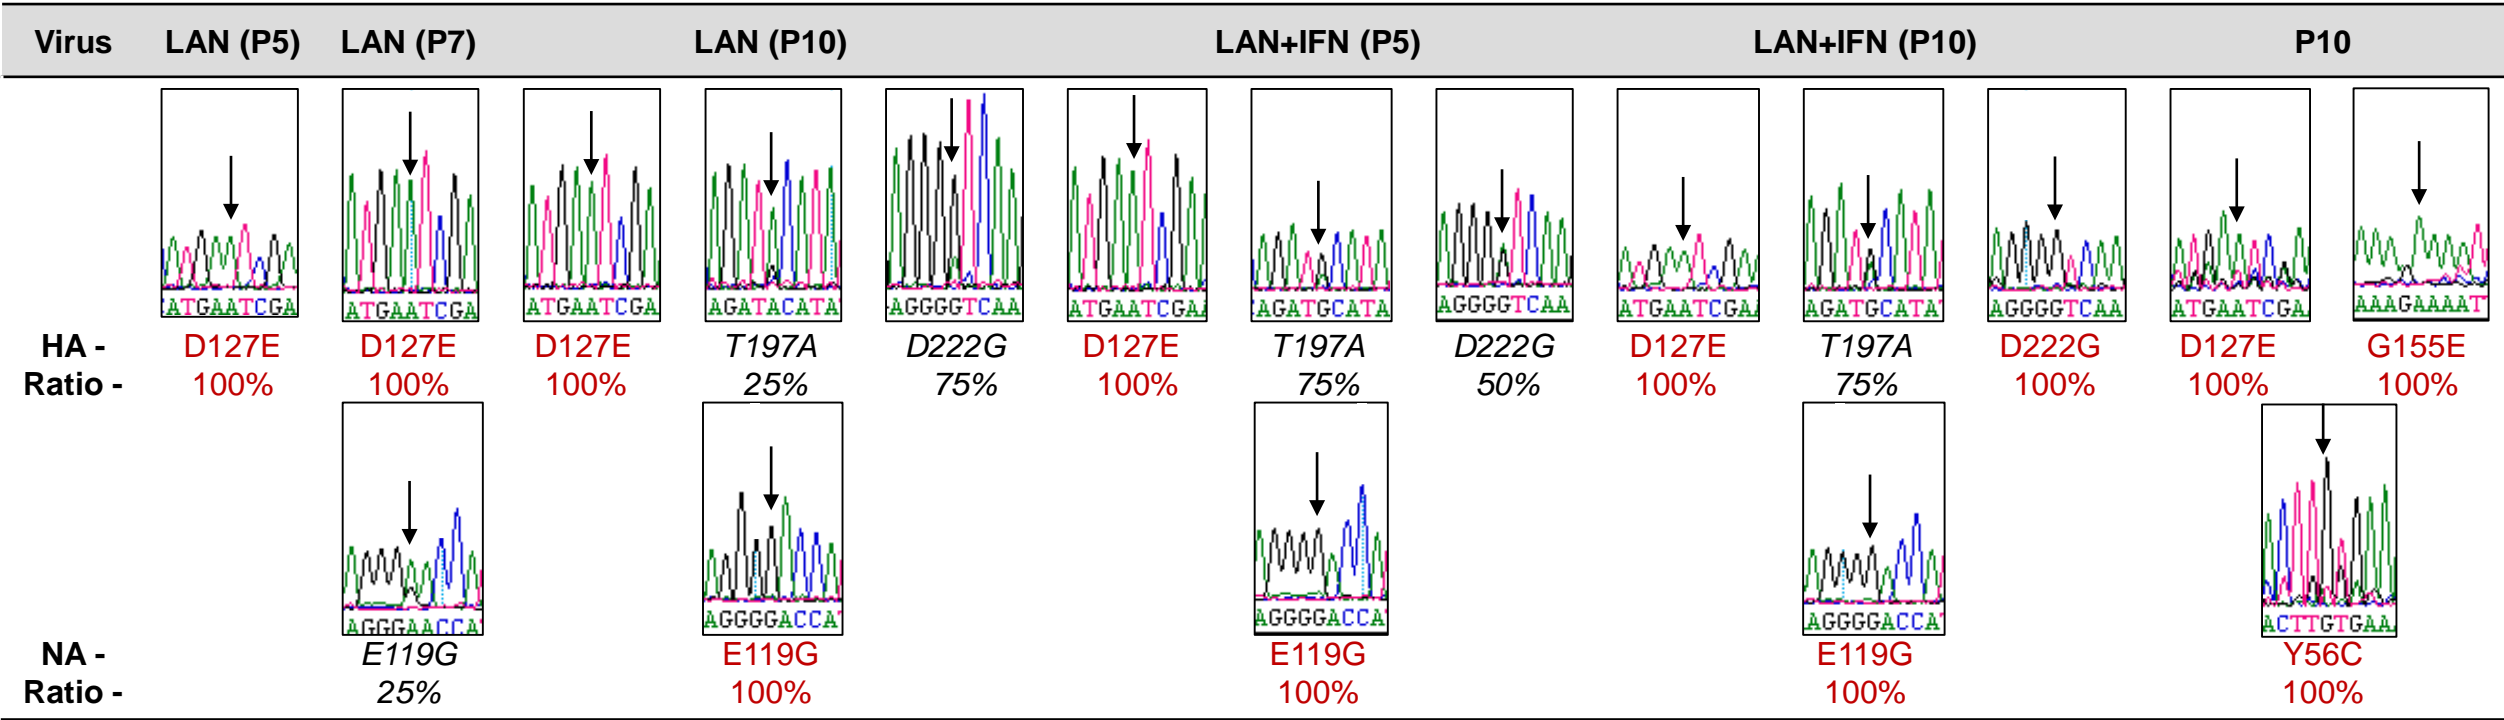

**LAN****LAN+IFN****D127E HA****D127E HA****T197A HA****D222G HA****E119G NA****P2**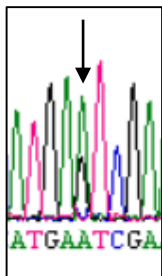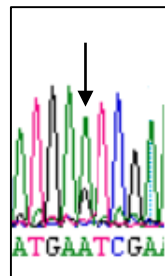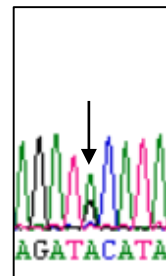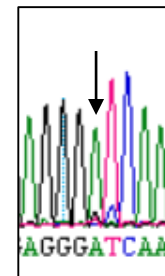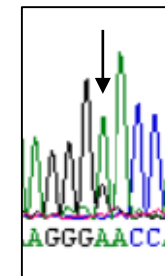**Ratio**

66%

75%

33%

0%

25%

**P3**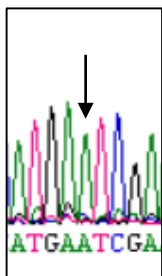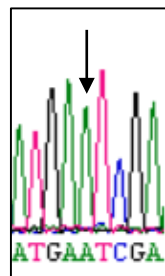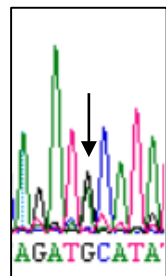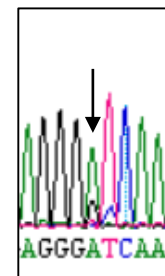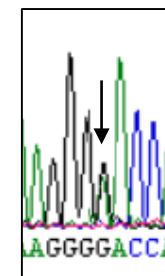**Ratio**

100%

100%

50%

20%

50%

**P4**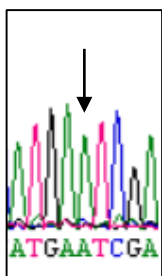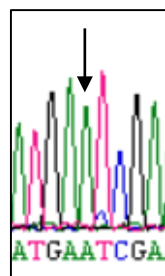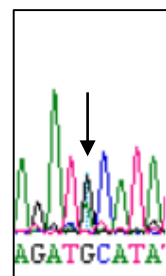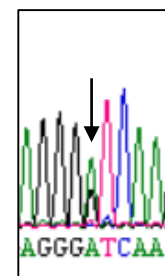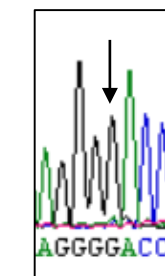**Ratio**

100%

100%

66%

33%

100%

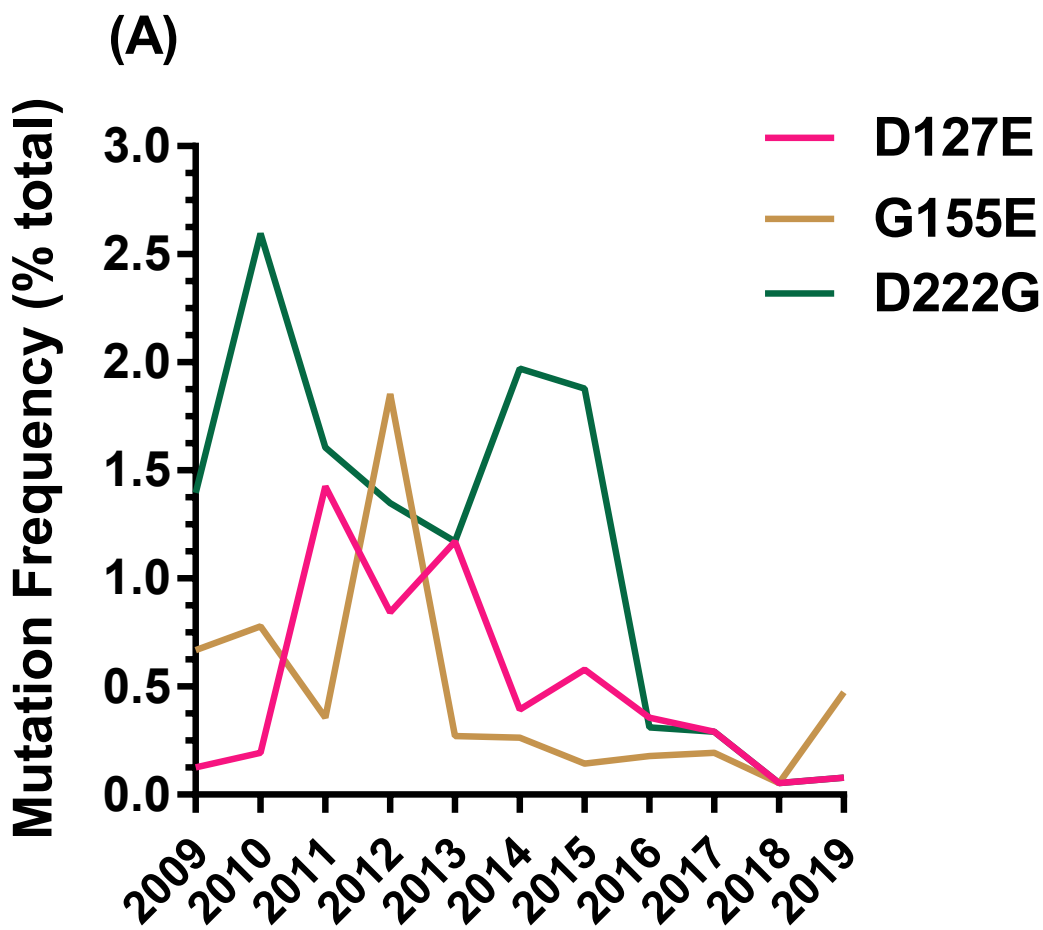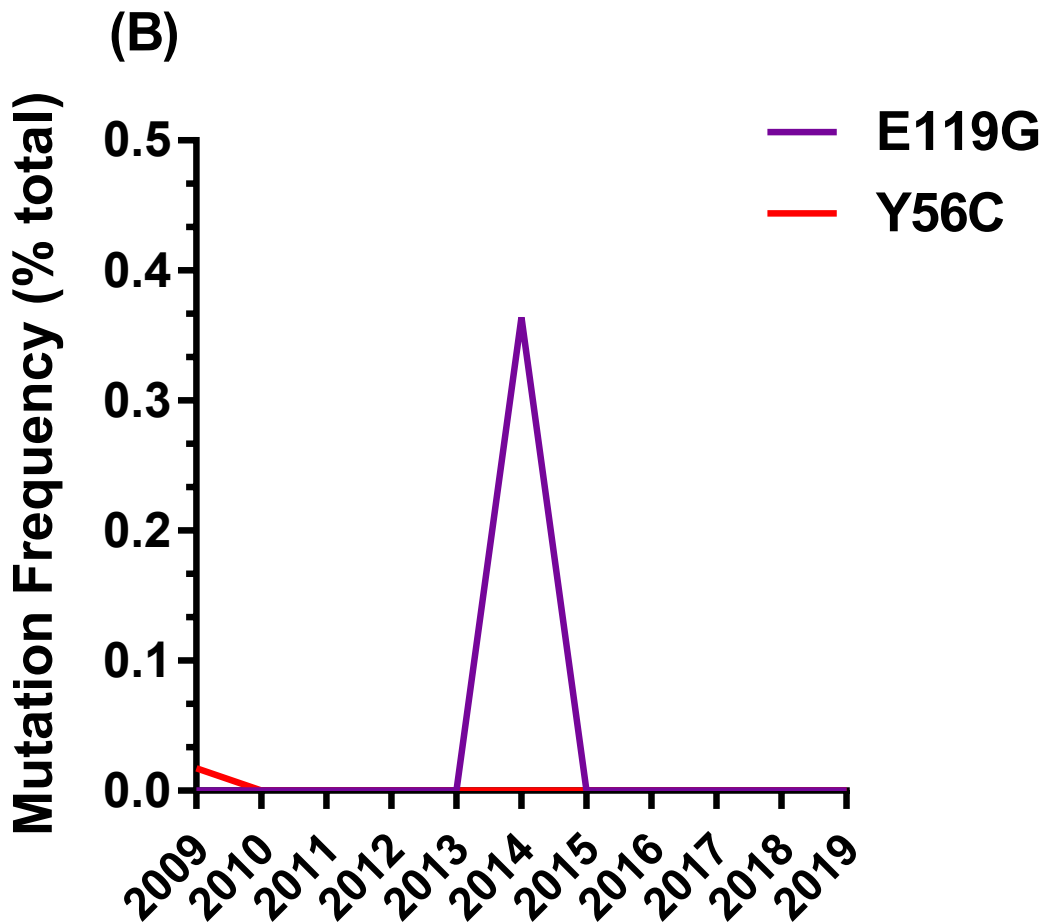

Supplement: AAC.00301-20-s0001.pdf [file AAC.00301-20-s0001.pdf]
